# Supplementary material for: Tuning the Ca content of Ni–Ca–Al layered-double hydroxide catalysts for low-temperature CO2 methanation
Source: Royal Society of Chemistry journal article supplement (doi:10.1039/d4ta04231j), 2024-01-01
Supplement: d4ta04231j1.pdf [file d4ta04231j1.pdf]

## Supplementary Material to “Tuning the Ca content of Ni-Ca-Al layered-double hydroxide catalysts for low-temperature CO<sub>2</sub> methanation”

Yan Resing Dias<sup>1</sup>, Oscar W. Perez-Lopez<sup>1,\*</sup>

<sup>1</sup> Laboratory of Catalytic Processes–PROCAT, Department of Chemical Engineering, Federal University of Rio Grande do Sul (UFRGS), Ramiro Barcelos Street, 2777, CEP 90035-007 Porto Alegre, Brazil

**Table S1.** Molar proportions of co-precipitated Ni-Ca-Al LDH catalysts.

| Sample       | Label | Ni (%M) | Ca (%M) | Al (%M) | M <sup>II</sup> /M <sup>III</sup> molar ratio | Ni/Ca molar ratio |
|--------------|-------|---------|---------|---------|-----------------------------------------------|-------------------|
| Ni63Ca3Al33  | Ca3   | 63      | 3       | 33      | 2                                             | 21                |
| Ni60Ca6Al33  | Ca6   | 60      | 6       | 33      | 2                                             | 10                |
| Ni55Ca11Al33 | Ca11  | 55      | 11      | 33      | 2                                             | 5                 |
| Ni44Ca22Al33 | Ca22  | 44      | 22      | 33      | 2                                             | 2                 |
| Ni33Ca33Al33 | Ca33  | 33      | 33      | 33      | 2                                             | 1                 |

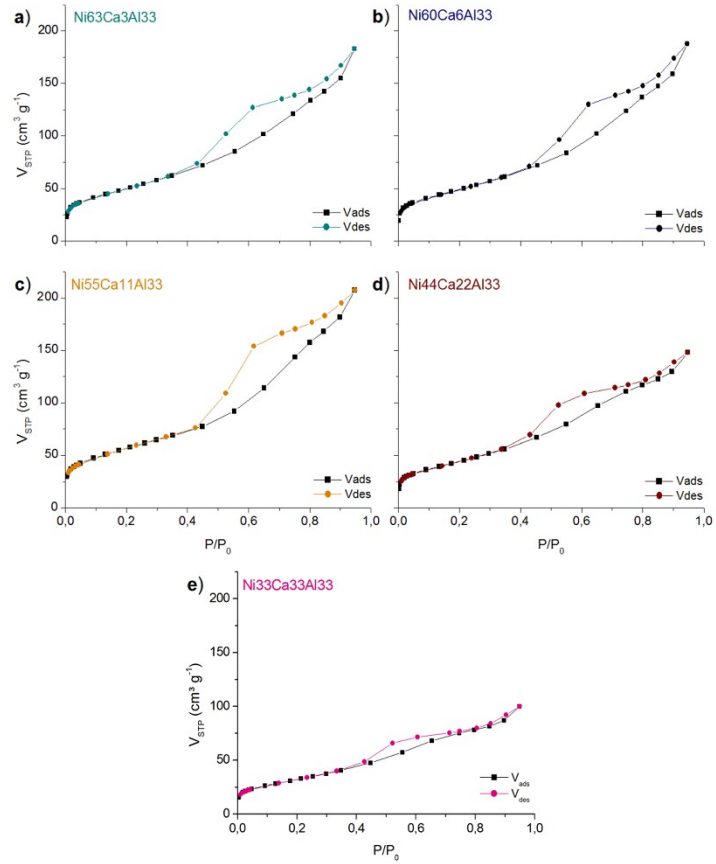

**Figure S1.**  $N_2$  physisorption isotherms of Ni-Ca-Al samples calcined at 600 °C: (a) Ni63Ca3Al33, (b) Ni60Ca6Al33, (c) Ni55Ca11Al33, (d) Ni44Ca22Al33, and (e) Ni33Ca33Al33.

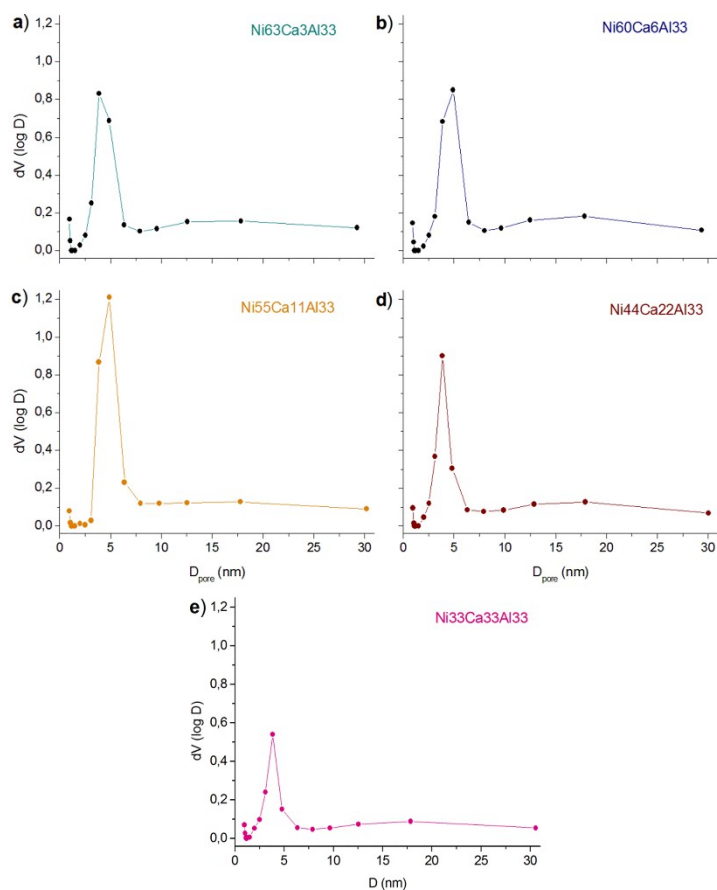

**Figure S2.** Pore diameter distributions from  $N_2$  physisorption data of Ni-Ca-Al samples calcined at  $600^\circ\text{C}$ : (a)  $\text{Ni}_{63}\text{Ca}_3\text{Al}_{33}$ , (b)  $\text{Ni}_{60}\text{Ca}_6\text{Al}_{33}$ , (c)  $\text{Ni}_{55}\text{Ca}_{11}\text{Al}_{33}$ , (d)  $\text{Ni}_{44}\text{Ca}_{22}\text{Al}_{33}$ , and (e)  $\text{Ni}_{33}\text{Ca}_{33}\text{Al}_{33}$ .

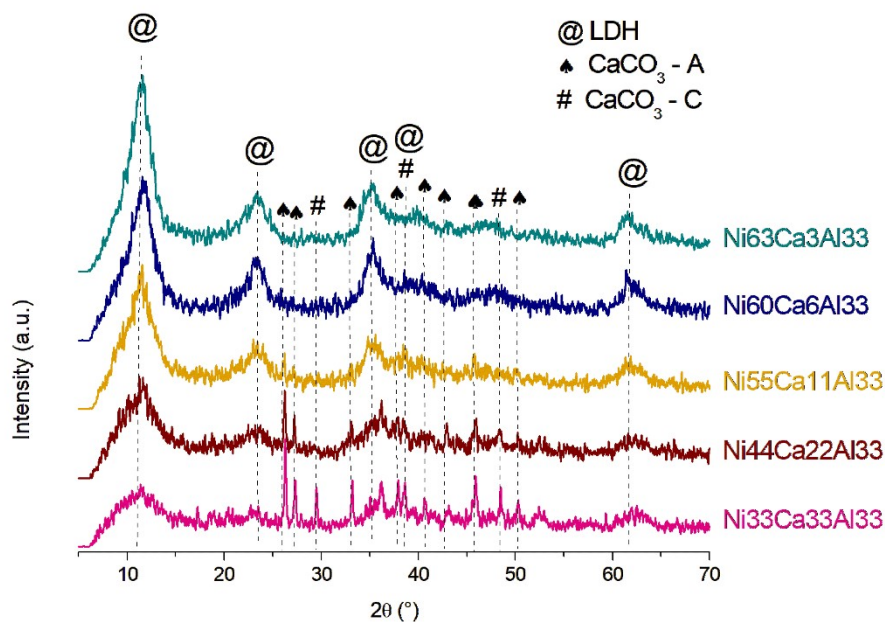

**Figure S3.** XRD patterns of as-prepared (LDH) Ni-Ca-Al samples.

**Table S2.** Quantified data from H<sub>2</sub>-TPR profile deconvolutions of Ni-Ca-Al samples.

| Sample       | Peak temperature (°C) |     |     |     |     | Peak area (%) |      |      |      |     | Total area<br>(a.u.) | Total H <sub>2</sub><br>consumption<br>( $\mu\text{mol g}_{\text{cat}}^{-1}$ ) |
|--------------|-----------------------|-----|-----|-----|-----|---------------|------|------|------|-----|----------------------|--------------------------------------------------------------------------------|
|              | T1                    | T2  | T3  | T4  | T5  | A1            | A2   | A3   | A4   | A5  |                      |                                                                                |
| Ni63Ca3Al33  | 508                   | 613 | 690 | -   | -   | 8.4           | 67.7 | 23.9 | -    | -   | 4068.7               | 1522.2                                                                         |
| Ni60Ca6Al33  | 502                   | 622 | 701 | -   | -   | 11.8          | 62.5 | 25.7 | -    | -   | 3991.7               | 1481.6                                                                         |
| Ni55Ca11Al33 | 518                   | 631 | 704 | -   | -   | 11.5          | 57.2 | 31.2 | -    | -   | 3950.9               | 1470.8                                                                         |
| Ni44Ca22Al33 | 479                   | 578 | 662 | 702 | -   | 5.6           | 38.7 | 50.4 | 5.3  | -   | 3552.4               | 1306.9                                                                         |
| Ni33Ca33Al33 | 491                   | 561 | 659 | 719 | 741 | 6.4           | 17.3 | 57.8 | 13.1 | 5.4 | 3192.6               | 1182.7                                                                         |

**Table S3.** Quantified data from CO<sub>2</sub>-TPD profile deconvolutions of reduced Ni-Ca-Al samples.

| Sample       | Peak temperature (°C) |     |     |     | Peak area (%) |      |      |      | Total<br>area<br>(a.u.) | CO <sub>2</sub> desorption<br>( $\mu\text{mol g}_{\text{cat}}^{-1}$ ) |                |
|--------------|-----------------------|-----|-----|-----|---------------|------|------|------|-------------------------|-----------------------------------------------------------------------|----------------|
|              | T1                    | T2  | T3  | T4  | A1            | A2   | A3   | A4   |                         | Weak-medium<br>sites                                                  | Total<br>sites |
| Ni63Ca3Al33  | 224                   | 312 | 496 | -   | 33.9          | 43.6 | 22.5 | -    | 212.0                   | 153.6                                                                 | 198.2          |
| Ni60Ca6Al33  | 222                   | 301 | 567 | -   | 26.8          | 49.9 | 23.3 | -    | 231.5                   | 165.5                                                                 | 215.7          |
| Ni55Ca11Al33 | 229                   | 342 | 625 | -   | 51.8          | 9.1  | 39.1 | -    | 223.7                   | 127.1                                                                 | 208.7          |
| Ni44Ca22Al33 | 212                   | 261 | 623 | -   | 21.7          | 15.5 | 62.8 | -    | 232.1                   | 80.8                                                                  | 217.0          |
| Ni33Ca33Al33 | 206                   | -   | 661 | 732 | 14.8          | -    | 62.1 | 23.1 | 429.9                   | 59.4                                                                  | 309.5          |

**Table S4.** Quantified data from H<sub>2</sub>-TPD profile deconvolutions of reduced Ni-Ca-Al samples.

| Sample       | Peak temperature (°C) |     |     |     | Peak area (%) |      |      |      | Total area (a.u.) | Total H <sub>2</sub> desorption (μmol g <sub>cat</sub> <sup>-1</sup> ) |
|--------------|-----------------------|-----|-----|-----|---------------|------|------|------|-------------------|------------------------------------------------------------------------|
|              | T1                    | T2  | T3  | T4  | A1            | A2   | A3   | A4   |                   |                                                                        |
|              | Ni63Ca3Al33           | 141 | 192 | 308 | 524           | 8.8  | 19.9 | 37.3 |                   |                                                                        |
| Ni60Ca6Al33  | 143                   | 195 | 327 | 554 | 6.5           | 24.7 | 41.3 | 27.5 | 820.2             | 301.2                                                                  |
| Ni55Ca11Al33 | 148                   | 211 | 364 | 545 | 10.5          | 31.6 | 32.9 | 25.0 | 720.1             | 265.8                                                                  |
| Ni44Ca22Al33 | 165                   | 245 | 374 | 474 | 16.5          | 20.1 | 15.7 | 47.8 | 670.0             | 247.8                                                                  |
| Ni33Ca33Al33 | 176                   | 299 | 427 | 540 | 24.5          | 25.7 | 38.7 | 26.5 | 339.6             | 133.9                                                                  |

**Table S5.** Turnover frequency (TOF) on stepwise catalytic tests at 200 °C over Ni-Ca-Al samples.

| Sample       | Turnover frequency, TOF (min <sup>-1</sup> ) |
|--------------|----------------------------------------------|
| Ni63Ca3Al33  | 3.8                                          |
| Ni60Ca6Al33  | 2.9                                          |
| Ni55Ca11Al33 | 3.1                                          |
| Ni44Ca22Al33 | 3.1                                          |
| Ni33Ca33Al33 | 3.2                                          |

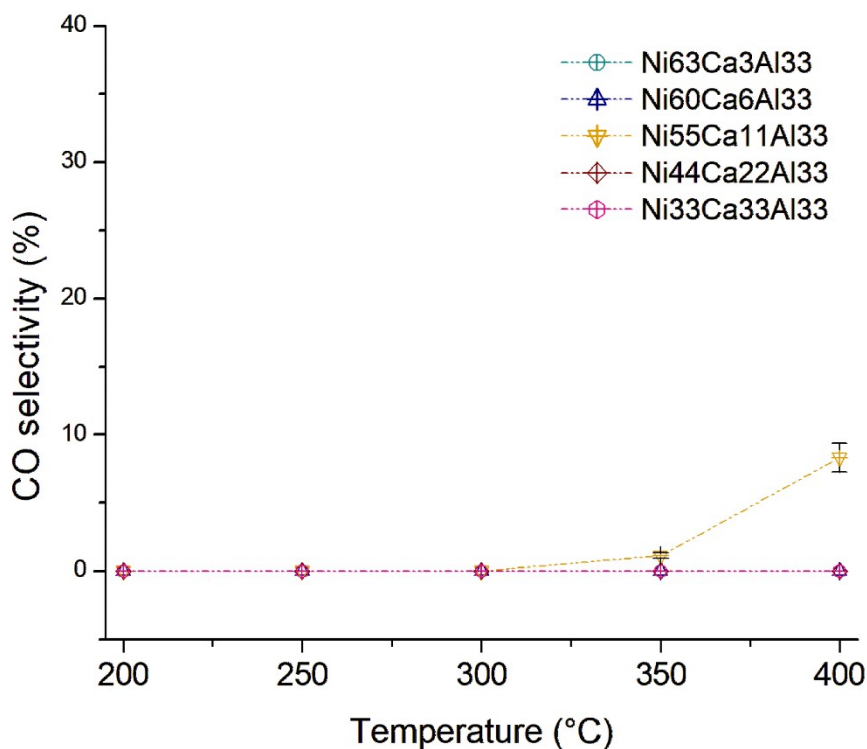

**Figure S4.** CO selectivity as a function of reactional temperature for CO<sub>2</sub> methanation over Ni-Ca-Al samples (GHSV = 60000 mL (g<sub>cat</sub> h)<sup>-1</sup>, H<sub>2</sub>:CO<sub>2</sub>:N<sub>2</sub> = 4:1:15, P = 1 atm).

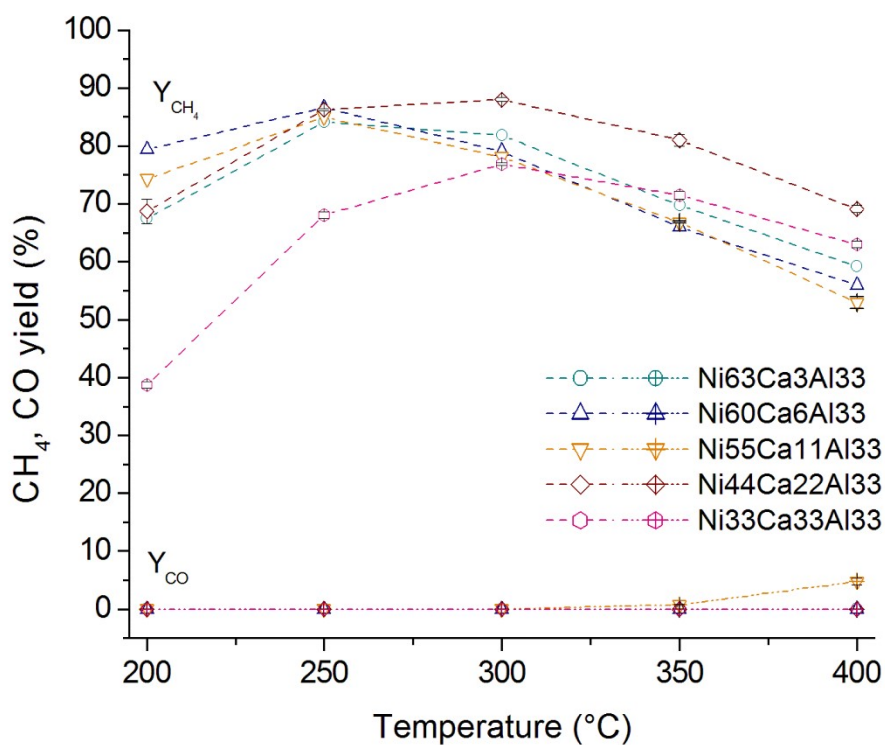

**Figure S5.** CH<sub>4</sub> and CO yield as a function of reactional temperature for CO<sub>2</sub> methanation over Ni-Ca-Al samples (GHSV = 60000 mL (g<sub>cat</sub> h)<sup>-1</sup>, H<sub>2</sub>:CO<sub>2</sub>:N<sub>2</sub> = 4:1:15, P = 1 atm).

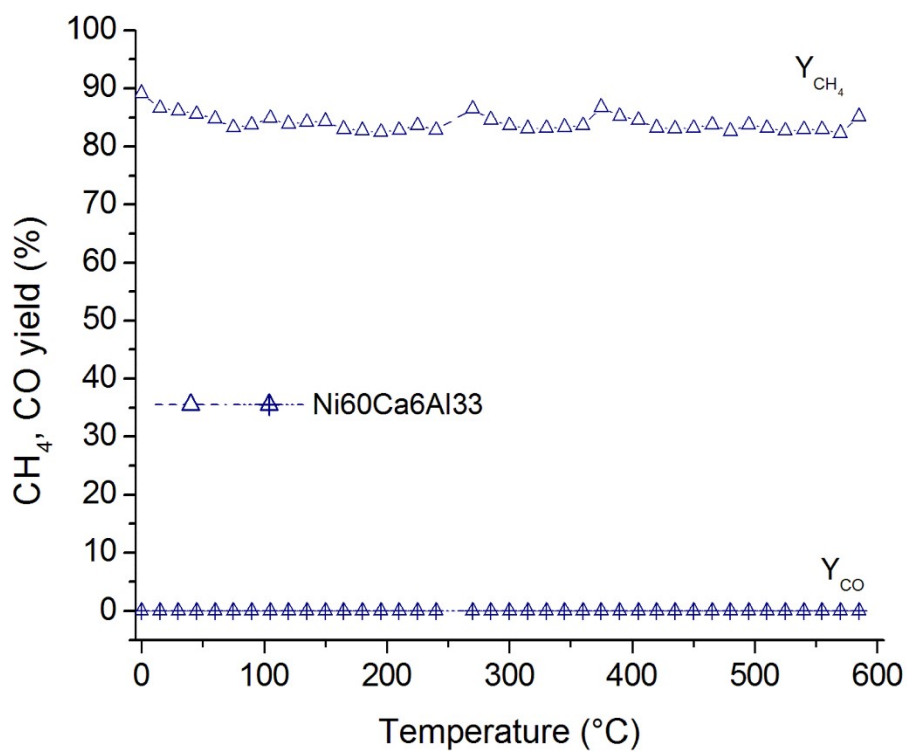

**Figure S6.** CH<sub>4</sub> and CO yield as a function of time-on-stream at 250 °C for CO<sub>2</sub> methanation over Ni60Ca6Al33 sample (GHSV = 60000 mL (g<sub>cat</sub> h)<sup>-1</sup>, H<sub>2</sub>:CO<sub>2</sub>:N<sub>2</sub> = 4:1:5, P = 1 atm).

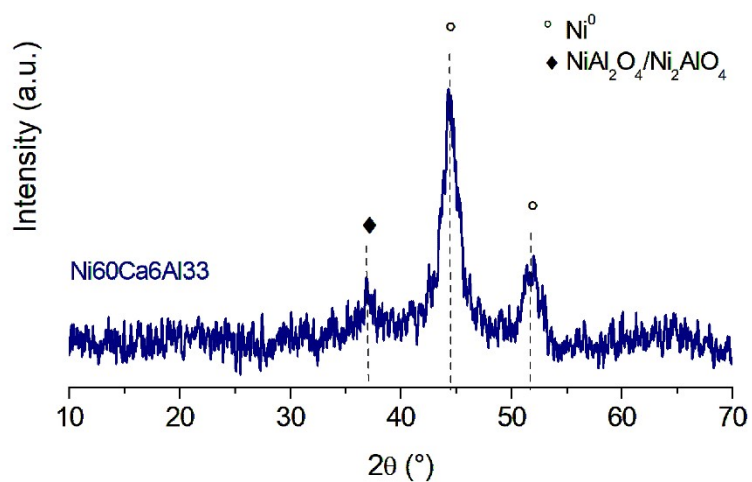

**Figure S7.** XRD pattern of Ni60Ca6Al33 sample spent on a 10 h stability test at 250 °C.

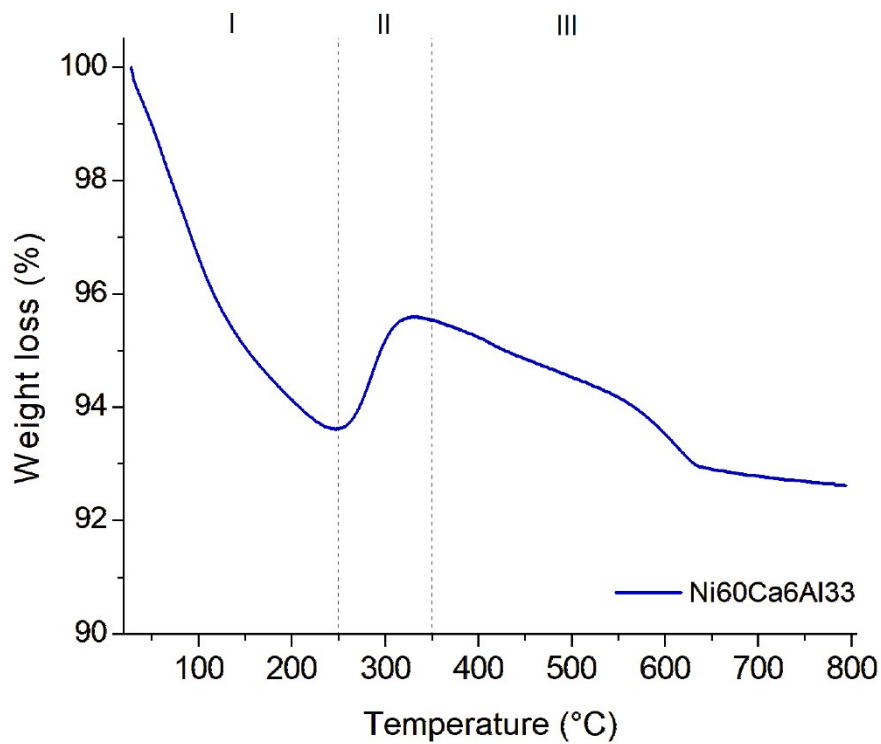

**Figure S8.** TPO profile of Ni60Ca6Al33 sample spent on a 10 h stability test at 250 °C.

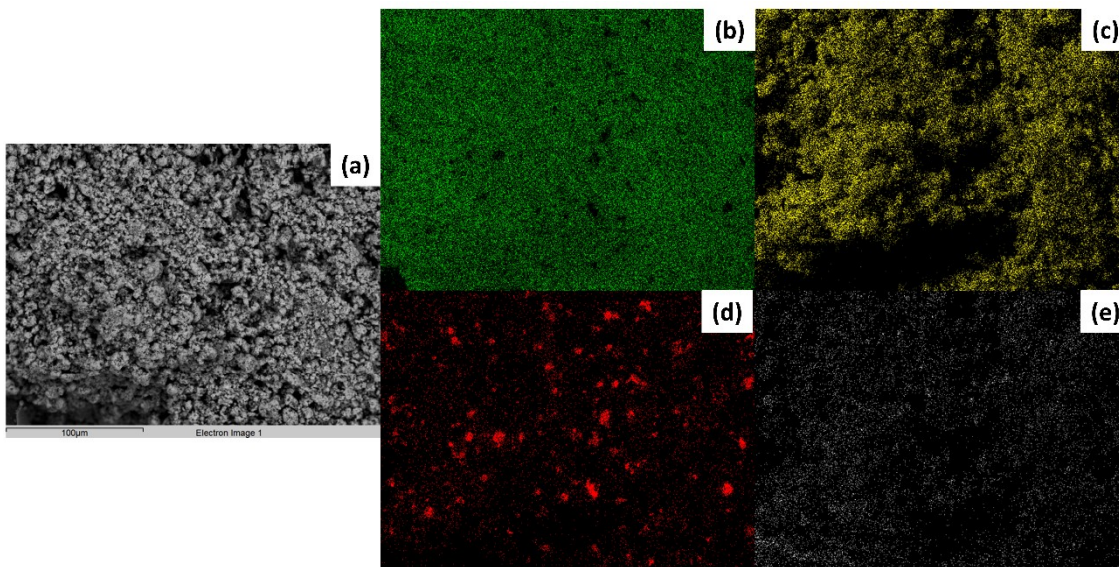

**Figure S9.** (a) Elemental distribution through EDS of Ni60Ca6Al33 sample spent on a 10 h stability test at 250 °C, where (b) Ni, (c) Al, (d) Ca, and (e) C.
